# Supplementary material for: High-temperature cultivation of recombinant Pichia pastoris increases endoplasmic reticulum stress and decreases production of human interleukin-10
Source: PubMed Central journal article supplement (PMC4251845; doi:10.1186/s12934-014-0163-7), 2014-11-26
Supplement: 12934_2014_163_MOESM2_ESM.pdf [file 12934_2014_163_MOESM2_ESM.pdf]

**Table S1: Primers for quantitative real-time PCR (5'-3')**

|                   |                                |
|-------------------|--------------------------------|
| HAC1 (spliced)-Fw | AGAGTCCGATGAGAACTTCTTGTTGAGTTC |
| HAC1 (spliced)-Rv | GCGGTAAATGGTGCTGCTGGATGATG     |
| HAC1 (total)-Fw   | GCGGCCCATGCTTCCAGAGAG          |
| HAC1(total)-Rv    | CGGTACCACCTAAGGCTTCCAACC       |
| ACT1-Fw           | GTGCAGCCTCGCGCTTGTTT           |
| ACT1-Rv           | CTGTGTGTGGGGCGTCGTCT           |
| KAR2-Fw           | TGGAGAACTACGCTCATTCCCTTAGGA    |
| KAR2-Rv           | TGGTTGCGGTGTCTGAAGTTGTCT       |
| ERO1-Fw           | GTTGGAAAAGCCGCATATAAACAAAACA   |
| ERO1-Rv           | CAGCTTGGGCAAAGTCCTGTAAGAGTTC   |
| AOX1-Fw           | TACACCACCGCTCTTTTG             |
| AOX1-Rv           | TCTCGTAAGTGCCCAACTT            |
| ARG4-Fw           | TCCTCCGGTGGCAGTTCTT            |
| ARG4-Rv           | TCCATTGACTCCCGTTTTGAG          |
| ATG1-Fw           | TCCGGAGAATAGCAAAGGCCTGAA       |
| ATG1-Rv           | AACCGGAGGTGAAAGTAGCAGGTT       |
| ATG7-Fw           | TGAGCCTCTTACTTCCGAGCCAAA       |
| ATG7-Rv           | ACCAAAGCACCTATATCGGCCAGT       |
| ATG8-Fw           | AATGCGGATCCGGTACAAGTTTGC       |
| ATG8-Rv           | TTAGGTTCGCATGGAACCAGGTACT      |
| ATG9-Fw           | GTCCACAACCCGTTGTTTGCTGAT       |
| ATG9-Rv           | TGGTTTGGAGTCCTCTTCATCGCT       |
| ATG11-Fw          | ATCAACCTTGGGCGGCTTTCAATG       |
| ATG11-Rv          | TGCTTTCAATCCGTGCAAGAACCC       |
