# Supplementary material for: High-temperature cultivation of recombinant Pichia pastoris increases endoplasmic reticulum stress and decreases production of human interleukin-10
Source: PubMed Central journal article supplement (PMC4251845; doi:10.1186/s12934-014-0163-7), 2014-11-26
Supplement: 12934_2014_163_MOESM3_ESM.pdf [file 12934_2014_163_MOESM3_ESM.pdf]

**Table S2: Quantitation of copy numbers**

| Sample | C <sub>T</sub> (AOX1) | C <sub>T</sub> (ARG4) | ΔC <sub>T</sub> | ΔΔC <sub>T</sub> | 2 <sup>-ΔΔC<sub>T</sub></sup> | Copy Number  |
|--------|-----------------------|-----------------------|-----------------|------------------|-------------------------------|--------------|
| X-33   | 22.744±0.743          | 22.781±0.800          | -0.037±0.082    | 0                | 1                             | 0            |
| L      | 22.065±0.725          | 23.100±0.768          | -1.035±0.153    | -0.999±0.073     | 2.000±0.100                   | 1.000±0.100  |
| M      | 20.008±0.736          | 22.605±0.560          | -2.597±0.194    | -2.560±0.119     | 5.912±0.500                   | 4.912±0.500  |
| H      | 19.448±0.890          | 22.949±0.725          | -3.501±0.170    | -3.464±0.123     | 11.061±0.933                  | 10.061±0.933 |

Data represents Mean ± SD, n = 3.
